## Estimating the Failure Risk of Quarantine Systems for Preventing COVID-19 Outbreaks in Australia and New Zealand

Leah Grout,<sup>1\*</sup> Ameera Katar,<sup>2</sup> Driss Ait Ouakrim,<sup>2</sup> Jennifer A. Summers,<sup>1</sup> Amanda Kvalsvig,<sup>1</sup> Michael G. Baker,<sup>1</sup> Tony Blakely,<sup>2</sup> Nick Wilson<sup>1</sup>

<sup>1</sup> Department of Public Health, University of Otago Wellington, New Zealand

<sup>2</sup> Melbourne School of Population and Global Health, University of Melbourne, Melbourne, Australia

\* Corresponding author: [leah.grout@otago.ac.nz](mailto:leah.grout@otago.ac.nz)

### Abstract

**Objectives:** To identify COVID-19 outbreaks and border control failures associated with quarantine systems in Australia and New Zealand and to estimate the failure risks.

**Design, setting, participants:** Observational epidemiological study of travellers transiting quarantine in Australia and New Zealand up to 31 March 2021.

**Main outcome measures:** The incidence of COVID-19 related failures arising from quarantine, and the failure risk for those transiting quarantine, estimated both per 100,000 travellers and per 1000 SARS-CoV-2 positive cases.

**Results:** Australia and New Zealand had 24 COVID-19 related failures arising from quarantine systems up to 31 March 2021 (14 and 10, respectively). One resultant outbreak involved an estimated 800 deaths and quarantine failures instigated nine lockdowns. The failure risk for those transiting quarantine was estimated at 6.3 failures per 100,000 travellers and 5.8 failures (95% CI: 3.5 to 8.1) per 1000 SARS-CoV-2 positive cases. The latter risk was three-fold higher in New Zealand compared with Australia. Approximately 55% of quarantine system failures could likely have been prevented with the full vaccination of frontline border workers, for 70% effectiveness at preventing transmission.

**Conclusions:** Quarantine system failures can be costly in terms of lives and economic impacts such as lockdowns. Ongoing improvements or alternatives to hotel-based quarantine are required.

---

## Introduction

New Zealand and Australian states have successfully eliminated community transmission of the pandemic virus SARS-CoV-2,<sup>1</sup> albeit with occasional outbreaks from imported cases that have typically been quickly brought under control. These two countries have primarily used hotel-based quarantine for citizens returning to their countries during the pandemic period, with 14 days of quarantine combined with PCR testing and mask use in any shared spaces (eg, common exercise areas used in New Zealand, but not in most Australian states).

Converting hotels for quarantine purposes has the advantage of making use of a resource that would otherwise be underused during a pandemic, given declines in international tourism. However, the major disadvantage of hotel-based quarantine is that it is likely to be less effective than purpose-built quarantine facilities owing to shared spaces and lack of safe ventilation (as per WHO advice on air flow<sup>2</sup>). Moreover, the consequences of leakage of the virus out of quarantine (eg, through facility workers) may be more severe given higher population density in urban settings where the hotels are located. Given these issues, we aimed to estimate the failure risk of quarantine systems in New Zealand and Australia in terms of the spread of COVID-19 infection into the community.

As of 31 March 2021, the rolling 7-day average number of COVID-19 vaccine doses administered per 100 people was 0.18 in Australia and 0.08 in New Zealand<sup>3</sup> However, this was counted as single vaccine doses and does not equal the total number of people vaccinated (eg, the Pfizer/BioNTech vaccine which is currently used in New Zealand requires two doses).<sup>3</sup> The majority of border workers in Australia and New Zealand have been vaccinated (eg, over 56,000 doses had been administered to border workers as of 28 March,<sup>4</sup> and all hotel quarantine workers in Victoria who have face-to-face contact with returned travellers received their first dose of the vaccine by the first week in April<sup>5</sup>).

## Methods

We defined a quarantine system failure as where a border/health worker or person in the community with a link to the quarantine/isolation system, became infected with SARS-CoV-2. This definition included people infected in hospital from cases who had been transferred from a quarantine facility (as such cases were still in the 14-day quarantine process). But this definition did not include pandemic virus transmission between returnees within the quarantine facilities (as some other commentators have included in lists of failures in the Australian context<sup>6</sup>).

We searched official websites in both countries, and for the eight states and territories in Australia, to identify outbreaks and border control failures associated with quarantine systems (searches conducted between 6 January and 29 April 2021). Where an outbreak source was uncertain (eg, the Auckland, New Zealand, August 2020 outbreak) we used the best available evidence to classify it as a quarantine failure or not. We used two denominators: a) the estimated number of travellers who went through quarantine facilities during the 2020 year up to 31 March 2021; and b) the number of SARS-CoV-2 positive people who went through these facilities in this same time period. The unit of analyses were New Zealand, the eight Australian states and territories, and both countries combined.

For New Zealand, we used official data on both travellers going through the quarantine system,<sup>7</sup> along with official (Ministry of Health) data on SARS-CoV-2 positive cases,<sup>8</sup> although there are some discrepancies in the information about when regular testing began in Managed Isolation and Quarantine (MIQ) facilities. For Australia we used overseas arrival data<sup>9</sup> and health data.<sup>10 11</sup>

## **Results**

The collated data for quarantine system failures is shown in Table 1, with specific details of each event in the Appendix (Table A1). In Australia, 14 failures were identified, one causing over 800 deaths (Victoria's second wave) and eight out of the 14 resulting in lockdowns. In New Zealand, there were ten failures, with one causing an outbreak with three deaths, and also a lockdown.

**Table 1: Identified quarantine system failures in Australia and New Zealand during the COVID-19 pandemic, the relevant denominator populations and estimated failure risks (with numerator and denominator data up to 31 March 2021)**

| Jurisdiction                                   | Identified quarantine system failures | Travellers experiencing quarantine/isolation | Active cases of SARS-CoV-2 infection identified in quarantine | Failure risk per 100,000 travellers going through quarantine | Failure risk per 1000 positive cases in quarantine* (95%CI) | Comments                                                                                                                                                                                |
|------------------------------------------------|---------------------------------------|----------------------------------------------|---------------------------------------------------------------|--------------------------------------------------------------|-------------------------------------------------------------|-----------------------------------------------------------------------------------------------------------------------------------------------------------------------------------------|
| <b>New Zealand</b>                             | <b>10</b>                             | <b>127,730</b>                               | <b>758</b>                                                    | <b>7.8</b>                                                   | <b>13.2</b><br>(5.0 to 21.4)                                | From 17 June 2020 (date of the first positive test in a quarantine facility) until 31 March 2021, excluding 9 cases with no history of overseas travel. <sup>8</sup>                    |
| <b>Australian States and Territories</b>       |                                       |                                              |                                                               |                                                              |                                                             |                                                                                                                                                                                         |
| Australian Capital Territory (ACT)             | 0                                     | 765                                          | 25                                                            | 0.0                                                          | 0.0                                                         |                                                                                                                                                                                         |
| Queensland                                     | 3                                     | 40,896                                       | 543                                                           | 7.3                                                          | 5.5                                                         | Two of the failures occurred at a hospital during the quarantine process.                                                                                                               |
| New South Wales                                | 5                                     | 128,646                                      | 1,581                                                         | 3.9                                                          | 3.2                                                         |                                                                                                                                                                                         |
| Northern Territory                             | 0                                     | 9,180                                        | 88                                                            | 0.0                                                          | 0.0                                                         | Includes a non-hotel facility (a former workers' camp) <sup>12</sup>                                                                                                                    |
| South Australia                                | 1                                     | 13,023                                       | 230                                                           | 7.7                                                          | 4.3                                                         |                                                                                                                                                                                         |
| Tasmania                                       | 0                                     | 405                                          | 21                                                            | 0.0                                                          | 0.0                                                         |                                                                                                                                                                                         |
| Victoria                                       | 4                                     | 33,300                                       | 462                                                           | 12.0                                                         | 8.7                                                         | Victoria suspended flights from 14 February to 25 March 2021 due to the Holiday Inn cluster, where an illegal nebuliser allegedly caused a quarantine failure and resulted in 14 cases. |
| Western Australia                              | 1                                     | 29,383                                       | 450                                                           | 3.4                                                          | 2.2                                                         |                                                                                                                                                                                         |
| <b>All of Australia</b>                        | <b>14</b>                             | <b>255,598</b>                               | <b>3,400</b>                                                  | <b>5.5</b>                                                   | <b>4.1</b><br>(2.0 to 6.3)                                  | These only included cases diagnosed between 1 April 2020 until 31 March 2021.                                                                                                           |
| <b>Relative risk (New Zealand : Australia)</b> |                                       |                                              |                                                               |                                                              | <b>3.2</b> (1.4 to 7.2)                                     | P-value = 0.0081 (Mid-P exact, 2-tailed test)                                                                                                                                           |
| <b>New Zealand and Australia</b>               |                                       |                                              |                                                               |                                                              |                                                             |                                                                                                                                                                                         |
| <b>Both countries combined</b>                 | <b>24</b>                             | <b>383,328</b>                               | <b>4,158</b>                                                  | <b>6.3</b>                                                   | <b>5.8</b><br>(3.5 to 8.1)                                  |                                                                                                                                                                                         |

\* 95% confidence intervals are shown in parentheses for country-level risks only; state-level risks with zeros or low numbers are too sparse

Given our estimates of the number of travellers processed via quarantine systems (Table 1), the overall risks for both countries combined were one failure per 15,972 travellers, and one failure per 173 SARS-CoV-2 positive cases in quarantine. The combined data can also be interpreted as one outbreak leading to a lockdown response per 42,592 travellers; and approximately one death from COVID-19 per 477 travellers (using the 800 deaths estimate from Australia and the three deaths from New Zealand – although this figure is largely driven by the second wave in Victoria and is unlikely generalizable forward in time).

At the country level, there were 13.2 failures per 1000 SARS-CoV-2 positive cases transiting quarantine in New Zealand (95% confidence interval [CI]: 5.0 to 21.4), compared to 4.1 per 1000 SARS-CoV-2 positive cases in Australia (95%CI: 2.0 to 6.3) – a three-fold difference in risk (relative risk: 3.2, 95%CI: 1.4 to 7.2). Approximately 55.4% of quarantine system failures could have been preventable with the full vaccination of frontline border workers (Table A1) due to the combined effects of vaccination lowering the risk of getting infected by 70% or more (as in the case of the Moderna vaccine<sup>13</sup>), and the lesser duration of infectivity and lower peak infectivity for those infected.<sup>14</sup>

## Discussion

This analysis identified 24 failures of quarantine systems in Australia and New Zealand combined (up to 31 March 2021). The significantly higher failure risk per 1000 SARS-CoV-2 positive cases transiting quarantine in New Zealand versus Australia could reflect a lower quality approach in the former, with perhaps some of the difference due to greater detection in New Zealand from more border worker testing over a longer period.

These estimates are subject to chance variations due to the low numbers of failures. These estimates will also probably be an underestimate of all quarantine breaches, as not all of those infected will transmit the virus and start a detectable chain of transmission. Genomes of the first 649 viral isolates collected in New Zealand show that only 19% of virus introductions resulted in ongoing transmission of more than one additional case.<sup>15</sup> Therefore, counts of border failures are sensitive to how they are identified and defined. Indeed, with increased testing (eg, testing of people after leaving quarantine on day 16 as is now common in Australia), we may be detecting breaches that previously would have been undetected.

Looking forward, the failure risks per month in New Zealand and Australia may increase, given that the proportion of travellers returning to these countries who are infected is increasing due to global intensification of the pandemic and the increasing infectivity of new SARS-CoV-2 variants.<sup>16</sup> Indeed, there have been several clearly documented cases of spread *within* quarantine hotels (eg, two instances in Melbourne in February 2021, two instances in Sydney in April 2021), highlighting the increased risk and evolving situation with more highly infectious variants arriving from overseas.

However, offsetting this trend will be measures such as the vaccination of quarantine workers. In New Zealand, the vaccination of border workers began in February 2021 with the Pfizer/BioNTech vaccine. However, vaccination does not fully protect against SARS-CoV-2 transmission, although a moderate degree of protection is likely. For example, infection rates were halved for the AstraZeneca vaccine,<sup>17 18</sup> and perhaps reduced by 70% for the Moderna mRNA vaccine, as indicated by using swab results for asymptomatic infection plus symptomatic cases.<sup>13</sup> For vaccinated people who are infected, primate study evidence

suggests (consistent with expectation) that the infectivity is decreased in peak and duration,<sup>14</sup> further protecting the border.

Furthermore, the level of testing of quarantine workers has been increasing (eg,<sup>19</sup>; which will find some failures before they have a chance to establish as an outbreak in the community). There have been other improvements in the quarantine systems over time (eg, improved security, introduction of mask wearing within quarantine settings, reduction in shared spaces, improved PPE used by workers, and other procedures as detailed in both countries<sup>20 21</sup>).

Another risk reduction practice would be using better or purpose-built facilities in rural locations as these have less risk from close contacts in central business district hotels and within-building spread from poor ventilation systems. Limitations of our analysis include residual uncertainty around the cause of some outbreaks (eg, the Auckland August 2020), and imprecision with denominator data on traveller numbers for Australia (eg, some travellers were moved between states on domestic flights which is not captured in the official data we used). Additionally, case numbers are constantly changing, due to the number of reclassifications caused by false positives and duplications.

To substantially reduce the risk of SARS-CoV-2 incursion out of quarantine (until such time as enough of the population is vaccinated), the most obvious action is to reduce arrivals, or even suspend arrivals, from high infection locations (as New Zealand temporarily did for travel from India and other high risk countries in April 2021<sup>22</sup>). Beyond this, there are a range of other potential improvements in ongoing arrangements and processes as detailed in Table 2. Furthermore, the start of quarantine-free travel between Australia and New Zealand (also known as a "green zone") in April 2021 provides an opportunity to benchmark COVID-19 border control policies and practices, identify potential improvements in both countries, and harmonise best practices across the region. The green zone further intertwines the biosecurity status of both nations and it is therefore even more important to lower the risk of border failures that could disrupt such travel. This shift from a one-size-fits-all strategy to a risk-based approach to border management can be summarised as a 'traffic light' approach.<sup>23</sup>

**Table 2: List of potential policy and operational options for improved COVID-19 control associated with quarantine systems in Australia and New Zealand, including measures to reduce the numbers of infected people arriving into quarantine facilities**

| Policy option                                                            | Description                                                                                                                                                                                                                                                                                                                                                                                                                                                                                                                                                                                                                     | Our priority rankings |
|--------------------------------------------------------------------------|---------------------------------------------------------------------------------------------------------------------------------------------------------------------------------------------------------------------------------------------------------------------------------------------------------------------------------------------------------------------------------------------------------------------------------------------------------------------------------------------------------------------------------------------------------------------------------------------------------------------------------|-----------------------|
| 1. Cap travel from high prevalence countries and/or suspend for a period | Reduce the in-flow of travellers by reducing or suspending flights to Australia and New Zealand (NZ) from very high incidence countries where the pandemic is out of control. These governments have the legal powers to put conditions on the existing rights of their citizens to enter their country of citizenship (ie, on public health grounds).                                                                                                                                                                                                                                                                          | Top priority          |
| 2. Pre-departure testing plus/minus pre-departure quarantine             | Expand existing requirements for pre-departure testing to additional traveller source countries. Pre-departure testing could be expanded from not only a PCR test within 72 hours of departure to also add a rapid test at the airport immediately before departure (given many infected may have started shedding the virus in the previous 72 hours and most, but not all, of such cases will be detected by a rapid test even though it has lower sensitivity). Of note is that such arrangements are considered legally acceptable (see the above row). Pre-departure quarantine (eg, for a week), would provide additional | Top priority          |

| Policy option                                                                | Description                                                                                                                                                                                                                                                                                                                                                                                                                                                                                                                                                                                                                  | Our priority rankings |
|------------------------------------------------------------------------------|------------------------------------------------------------------------------------------------------------------------------------------------------------------------------------------------------------------------------------------------------------------------------------------------------------------------------------------------------------------------------------------------------------------------------------------------------------------------------------------------------------------------------------------------------------------------------------------------------------------------------|-----------------------|
|                                                                              | assurance, but this would probably need to be in a transport hub (eg, at an airport hotel at Singapore or Hawaii) where NZ and Australian officials were permitted access to ensure quality processes. Even if establishing a formal facility is shown to be impractical, all incoming travellers could be asked to self-quarantine as strictly as possible in the week before travel, eg, by a request through the passenger booking system (see Policy Option 4).                                                                                                                                                          |                       |
| 3. Pre-departure vaccination                                                 | Make travel contingent on completing a course of approved vaccination. This measure assumes the vaccine is at least partially effective at preventing transmission. This requirement needs further investigation and development.                                                                                                                                                                                                                                                                                                                                                                                            | Uncertain             |
| 4. Use passenger booking systems to reduce infection risk                    | Require passengers to declare pre-departure COVID-19 precautions via the system that they use to book spaces in quarantine facilities prior to travel. Such a system is operating in NZ and could be adopted more widely in Australia.                                                                                                                                                                                                                                                                                                                                                                                       | High priority         |
| 5. Increase in-flight precautions                                            | Explore means to reduce the risk of in-flight infection as documented on a flight to NZ. <sup>24</sup> This could be via more stringent enforcement of mask wearing in airports and on flights, use of higher-efficacy masks (and/or double masking), and minimizing talking when masks are displaced during eating and drinking on flights. Improved ventilation and spacing requirements on flights might also be worthwhile.                                                                                                                                                                                              | High priority         |
| 6. Reduce infection risk at airports and transit hubs                        | Ensure measures are in place at departure airports and transit hubs to minimize the risk of cross infection (eg, through physical distancing and mask use).                                                                                                                                                                                                                                                                                                                                                                                                                                                                  | Medium priority       |
| 7. Improve local transport arrangements                                      | Ensure sufficient physical distancing of travellers on arrival and in transit to quarantine (eg, lowering density on buses). For such arrangements, N95 masks could be required.                                                                                                                                                                                                                                                                                                                                                                                                                                             | Medium priority       |
| 8. Shift to discrete quarantine units                                        | Shift some or all quarantine facilities to rural military bases or camps where discrete units (eg, mobile homes or caravans) could be appropriately spatially separated. The success (to date – see Table A1 in the Appendix) of the Howard Springs facility (a converted workers' camp <sup>12</sup> ) should be considered. This approach allows for natural ventilation and eliminates shared indoor spaces. If spaces were limited, then these settings could be used for travellers from the highest risk countries.                                                                                                    | High priority         |
| 9. Restrict hotel quarantine in large cities to low-risk travellers          | Reserve hotel quarantine in large cities to the lowest risk category of travellers, with hotels in more minor cities being used for the highest risk category of travellers. However, the risk/benefit analysis of such changes would need to consider airport access and if the additional travelling to minor cities poses excessive additional risk.                                                                                                                                                                                                                                                                      | High priority         |
| 10. Expand use of PCR testing of saliva in facility workers (and travellers) | Expand the regular (daily) use of PCR testing of saliva of facility workers to all facilities in both countries. This approach could also be considered for all travellers, albeit potentially still combined with existing testing regimens. In view of increased transmissibility of new variants, consideration should be given to testing of all workers in border-associated occupations (eg, providing airline meals and laundry services) at least twice per week. Documented negative tests at appropriate frequency should be an occupational requirement for all border workers instead of the self-report systems | High priority         |

| Policy option                                              | Description                                                                                                                                                                                                                                                                                                                                                                                                                                                                               | Our priority rankings                                                         |
|------------------------------------------------------------|-------------------------------------------------------------------------------------------------------------------------------------------------------------------------------------------------------------------------------------------------------------------------------------------------------------------------------------------------------------------------------------------------------------------------------------------------------------------------------------------|-------------------------------------------------------------------------------|
|                                                            | (as currently used in NZ).                                                                                                                                                                                                                                                                                                                                                                                                                                                                |                                                                               |
| 11. Accelerate or mandate vaccination for quarantine staff | Vaccinate all quarantine workers against COVID-19 and redeploy all unvaccinated workers. This measure will be particularly valuable when vaccines are known to prevent transmission in addition to protecting recipients from illness.                                                                                                                                                                                                                                                    | As of April 2021, this is measure is nearing completion in some jurisdictions |
| 12. Cohorting complete flights of travellers               | Cohorting of flights means that all returnees arriving into a country go to the same quarantine facility until that facility is full and then the intake switches to another facility and so on. This approach is designed to reduce cross-infection in such facilities. This system was introduced in NZ on 16 May 2021.                                                                                                                                                                 | Medium priority                                                               |
| 13. Upgrade processes at quarantine facilities             | Upgrade processes at quarantine facilities in terms of eliminating shared spaces (eg, no shared exercise areas and shared smoking areas), in particular ensuring that day cohorts do not mix under any circumstances. Ventilation improvements could also be considered with limiting the use of rooms to those with external windows.                                                                                                                                                    | Medium priority                                                               |
| 14. Prosecute rule breaking in quarantine facilities       | Enforce quarantine facility rules more rigorously. Rule breaking, which is relatively common in NZ facilities, <sup>25</sup> could start to be prosecuted (given no prosecutions during 2020).                                                                                                                                                                                                                                                                                            | Medium priority                                                               |
| 15. Improve conditions for quarantine staff                | Improve working conditions for the staff in quarantine facilities to minimize the risk of overwork (which may increase the risk of PPE failures) or of workers taking on other part-time jobs in other settings. For example, in February 2021 there were still concerns by NZ health workers about staffing inadequacies in these facilities.                                                                                                                                            | High priority                                                                 |
| 16. Improve management of travellers who smoke             | Introduce specific measures for travellers who are nicotine dependent to reduce their need to smoke in designated areas during their travel and while in managed quarantine (eg, nicotine replacement treatment as a requirement for travel).                                                                                                                                                                                                                                             | Medium priority                                                               |
| 17. Add post-quarantine control measures                   | Introduce a post-quarantine period of home-quarantine to reduce the risk of local transmission arising from undetected infections in people leaving hotel quarantine facilities (which may arise from either exceptionally long incubation periods or cross infection during quarantine stays). Post-quarantine testing could also be used to detect such infections.                                                                                                                     | Medium priority                                                               |
| 18. Mandate the use of digital contact tracing tools       | Mandate quarantine workers to use digital technologies (eg, the Bluetooth function on the NZ COVID Tracer smartphone app) to facilitate contact tracing in the event of a border failure. Travellers could be required to use such technologies for two weeks after completing their time in quarantine. There is also a case for travellers using these tools within quarantine as (at least in NZ) quarantine facilities are sometimes evacuated for fire alarms and burst water pipes. | Medium priority                                                               |



## Conclusions

In summary, Australia and New Zealand have had 24 COVID-19 identified failures arising from quarantine systems up to 31 March 2021. Quarantine system failures can be costly in terms of lives and economic impacts such as lockdowns. Ongoing improvements or alternatives to hotel-based quarantine are required.

**Competing interests:** Nil.

**Funding:** Prof Baker and Dr Kvalsvig received funding support from the Health Research Council of New Zealand (20/1066). Dr Grout, Ms Katar, Dr Ait Ouakrim, Dr Summers, Prof Blakely, and Prof Wilson did not have external funding support.

## Appendix

**Appendix Table A1: List of COVID-19 border control failures associated with quarantine systems in Australia and New Zealand during 2020 and up to 31 March 2021**

| Event                                                                          | Extent of known spread                                                | Details                                                                                                                                                                                                                                                                                                                                                                                                                                                                                                                                                                                                                                                                                                                                                                                                                                                                                                                                                                                                                                                                                                                                                                                              | Event preventable with full vaccination of frontline border workers (assuming 100% effectiveness)? |
|--------------------------------------------------------------------------------|-----------------------------------------------------------------------|------------------------------------------------------------------------------------------------------------------------------------------------------------------------------------------------------------------------------------------------------------------------------------------------------------------------------------------------------------------------------------------------------------------------------------------------------------------------------------------------------------------------------------------------------------------------------------------------------------------------------------------------------------------------------------------------------------------------------------------------------------------------------------------------------------------------------------------------------------------------------------------------------------------------------------------------------------------------------------------------------------------------------------------------------------------------------------------------------------------------------------------------------------------------------------------------------|----------------------------------------------------------------------------------------------------|
| <b>Australia</b>                                                               |                                                                       |                                                                                                                                                                                                                                                                                                                                                                                                                                                                                                                                                                                                                                                                                                                                                                                                                                                                                                                                                                                                                                                                                                                                                                                                      |                                                                                                    |
| Rydges Hotel – Victoria "second wave" outbreak (late May to late October 2020) | Over 19,800 cases, <sup>26 27</sup> and over 800 deaths <sup>28</sup> | Genomic testing indicated that 99% of Victoria's second wave of community COVID-19 cases were linked to transmission events related to returned travellers infecting workers at the Rydges Hotel in Carlton and the Stamford Plaza Hotel (see row below) in Melbourne's central business district (CBD), which were used as facilities for quarantine. <sup>29</sup> Specifically, around 90% of cases can be traced back to a single family of four that returned to Australia in mid-May and were quarantined at the Rydges Hotel. <sup>30</sup> The virus then spread from the infected workers to the community, with high rates of local transmission. <sup>29</sup> The outbreak led to a stringent lockdown for 112 days in the state, with particularly strict measures in the major city of Melbourne. <sup>31</sup> At least nine people employed in Melbourne's hotel quarantine program tested positive between late July and early October 2020, although the cases may have been a reflection of substantial community transmission in Melbourne at the time rather than additional hotel quarantine failures. <sup>32</sup> Two of those cases worked while infectious. <sup>32</sup> | Likely                                                                                             |
| Stamford Plaza Hotel - Victoria "second wave" outbreak (late May to late       | See row above                                                         | Almost 10% of cases in Victoria's "second wave" outbreak were attributable to an outbreak at the Stamford Hotel in mid-June. <sup>29</sup> The outbreak was traced back to international travellers who returned to Australia in early June, <sup>29</sup> and then was spread by                                                                                                                                                                                                                                                                                                                                                                                                                                                                                                                                                                                                                                                                                                                                                                                                                                                                                                                    | Likely                                                                                             |

| Event                                                                         | Extent of known spread                          | Details                                                                                                                                                                                                                                                                                                                                                                                                                                                                                                                                         | Event preventable with full vaccination of frontline border workers (assuming 100% effectiveness)? |
|-------------------------------------------------------------------------------|-------------------------------------------------|-------------------------------------------------------------------------------------------------------------------------------------------------------------------------------------------------------------------------------------------------------------------------------------------------------------------------------------------------------------------------------------------------------------------------------------------------------------------------------------------------------------------------------------------------|----------------------------------------------------------------------------------------------------|
| October 2020)                                                                 |                                                 | security guards who worked at the facility. <sup>33</sup>                                                                                                                                                                                                                                                                                                                                                                                                                                                                                       |                                                                                                    |
| Marriot Hotel at Circular Quay in Sydney, New South Wales [NSW] (August 2020) | 2 security guards                               | A security guard at the Marriot Hotel at Circular Quay in Sydney tested positive for COVID-19 on 15 August. <sup>34</sup> Genomic sequencing linked the infection to a returned overseas traveller at the facility. <sup>34</sup> A second security guard subsequently tested positive. <sup>35</sup>                                                                                                                                                                                                                                           | Likely                                                                                             |
| Parafield outbreak in South Australia (December 2020)                         | 33 cases <sup>28</sup>                          | Genomic testing indicated that Adelaide's Parafield cluster was linked to transmission events related to a returned traveller in a quarantine hotel infecting workers in the facility, possibly due to poor ventilation at the facility. <sup>29</sup> The virus spread from the workers to the community, resulting in a strict lockdown. <sup>29</sup>                                                                                                                                                                                        | Likely                                                                                             |
| Quarantine hotel facility cleaner infected in Sydney, NSW (December 2020)     | A single worker                                 | A quarantine hotel worker (a cleaner) who completed shifts at two quarantine hotels, the Ibis Hotel and the Novotel in Darling Harbour in Sydney, tested positive in early December. <sup>36</sup> There was also spread in a facility with 5 returned travellers being infected.                                                                                                                                                                                                                                                               | Likely                                                                                             |
| Avalon outbreak in NSW (January 2021)                                         | 151 cases (as of 11 January 2021) <sup>37</sup> | It has been reported that genomic sequencing suggests that the strain is of US origin and entered Australia via an infectious returned traveller who entered hotel quarantine upon arrival. <sup>36</sup> It is currently unknown how the virus spread to the community and source investigations were still underway (as per January 2021). Case numbers include those from the linked Croydon and Wollongong clusters, but not the linked Black Rock cluster in Victoria (27 cases as of 5 January 2021) due to separate reporting by states. | Unclear                                                                                            |
| Berala outbreak in NSW (January 2021)                                         | 26 cases (as of 11 January 2021) <sup>37</sup>  | It has been reported that genomic sequencing linked the outbreak back to infectious international travellers. <sup>38</sup> A patient transport worker transferred infectious travellers from Sydney Airport to a hospital. <sup>37 38</sup> Another patient transport worker who was a close contact of the first then also tested positive <sup>37 38</sup> The virus then spread from the second infected worker into the community, seeding the Berala outbreak. <sup>38</sup>                                                              | Likely                                                                                             |
| Hotel Grand Chancellor outbreak in Brisbane, Queensland (January 2021)        | 6 cases (as of 13 January 2021) <sup>39</sup>   | A hotel quarantine worker in Brisbane tested positive in early January 2021 for the UK variant of COVID-19 (ie, B.1.1.7). <sup>40</sup> This case led to a three-day lockdown in the greater Brisbane area, while contact tracers worked to ensure there was no community transmission of the strain. <sup>41</sup> It was later revealed that there were six genomically linked cases within the quarantine facility, including the hotel quarantine worker and five returned travellers. <sup>39</sup>                                        | Likely                                                                                             |
| Four Points by                                                                | A single                                        | A Perth quarantine hotel security guard, who worked                                                                                                                                                                                                                                                                                                                                                                                                                                                                                             | Likely                                                                                             |

| Event                                                              | Extent of known spread | Details                                                                                                                                                                                                                                                                                                                                                                                                                                                                                                                                                                                                                                                                                                                                                                                                                                                                                                                                                                                                                                                     | Event preventable with full vaccination of frontline border workers (assuming 100% effectiveness)?                                                               |
|--------------------------------------------------------------------|------------------------|-------------------------------------------------------------------------------------------------------------------------------------------------------------------------------------------------------------------------------------------------------------------------------------------------------------------------------------------------------------------------------------------------------------------------------------------------------------------------------------------------------------------------------------------------------------------------------------------------------------------------------------------------------------------------------------------------------------------------------------------------------------------------------------------------------------------------------------------------------------------------------------------------------------------------------------------------------------------------------------------------------------------------------------------------------------|------------------------------------------------------------------------------------------------------------------------------------------------------------------|
| Sheraton hotel, Western Australia (January 2021)                   | worker                 | a second job as a ride share driver, tested positive to the UK strain of SARS-CoV-2, sparking a five-day lockdown for 80 per cent of the state's population, in an attempt to stop any further transmission. <sup>42</sup> It's believed he was exposed to the virus on the 26 January when he worked at Four Points by Sheraton, on the same floor where a quarantined returned traveller with a confirmed case of the UK variant was staying. After feeling sick on 28 January, the case visited a GP, and tested positive on 30 January. The exact cause is unknown, but it's believed poor ventilation could be a factor. <sup>43</sup> This comes a week after Western Australia committed to daily testing of the hotel quarantine staff, instead of weekly. <sup>44</sup> Quarantine hotel staff, including cleaners, security guards and catering staff, are no longer allowed to have second jobs but will receive a pay increase of about 40 per cent as compensation. <sup>42</sup> It has been announced an inquiry will be held. <sup>43</sup> |                                                                                                                                                                  |
| Grand Hyatt Hotel, Victoria (February 2021)                        | A single worker        | One 26-year-old staff member at the Grand Hyatt Hotel (an isolation facility) tested positive for the highly transmissible UK variant of COVID-19 (ie, the B.1.1.7 variant) in February 2021, leading to heightened restrictions. <sup>45</sup> The close contacts of the case all tested negative, and the outbreak did not spread into the wider community. <sup>45</sup>                                                                                                                                                                                                                                                                                                                                                                                                                                                                                                                                                                                                                                                                                 | Likely                                                                                                                                                           |
| Holiday Inn Hotel Cluster, Victoria (February 2021)                | 22 cases               | Twenty-two cases have been linked to the Holiday Inn cluster in Melbourne, where an infected returned traveller used a nebuliser, causing an outbreak and a 5-day lockdown. <sup>46</sup> There were no further cases detected in the community during the lockdown as all confirmed cases had already been informed of their status as close contacts and were in isolation for the duration of their infectious period. Cases included returned travellers, hotel quarantine staff and their families, as well as a Melbourne Airport worker. <sup>46</sup>                                                                                                                                                                                                                                                                                                                                                                                                                                                                                               | Likely                                                                                                                                                           |
| Princess Alexandra Hospital Doctor outbreak, Brisbane (March 2021) | 6 cases <sup>47</sup>  | A doctor and a nurse (see row below) who worked at the Princess Alexandra Hospital while unvaccinated were linked to two separate COVID-19 outbreaks. <sup>47</sup> While both outbreaks were the highly transmissible UK variant of the disease and originated at the same hospital, they were from two different sources. <sup>47</sup> The doctor tested positive on 12 March 2021, with subsequent infections in 5 other persons. <sup>47</sup> These outbreaks resulted in a 3-day lockdown just before the Easter holiday. <sup>47</sup>                                                                                                                                                                                                                                                                                                                                                                                                                                                                                                              | Likely (we considered health workers at the Princess Alexandra to be "border workers" given that the hospital patients were still part of the quarantine system) |
| Princess Alexandra Hospital Nurse outbreak,                        | 13 cases <sup>48</sup> | A nurse (see row above) who worked on a COVID-19 ward at the Princess Alexandra Hospital while unvaccinated tested positive in late March. <sup>47</sup> Genome sequencing links the case to an overseas                                                                                                                                                                                                                                                                                                                                                                                                                                                                                                                                                                                                                                                                                                                                                                                                                                                    | Likely (we considered health workers at the Princess Alexandra                                                                                                   |

| Event                                                     | Extent of known spread                            | Details                                                                                                                                                                                                                                                                                                                                                                                                                                                                                                                                                                                                                                                                                                                                                                                                                                                                                                                                                                                                                                                                                                                                                                                                                                                                            | Event preventable with full vaccination of frontline border workers (assuming 100% effectiveness)? |
|-----------------------------------------------------------|---------------------------------------------------|------------------------------------------------------------------------------------------------------------------------------------------------------------------------------------------------------------------------------------------------------------------------------------------------------------------------------------------------------------------------------------------------------------------------------------------------------------------------------------------------------------------------------------------------------------------------------------------------------------------------------------------------------------------------------------------------------------------------------------------------------------------------------------------------------------------------------------------------------------------------------------------------------------------------------------------------------------------------------------------------------------------------------------------------------------------------------------------------------------------------------------------------------------------------------------------------------------------------------------------------------------------------------------|----------------------------------------------------------------------------------------------------|
| Brisbane (March 2021)                                     |                                                   | traveller from India who was being cared for at the hospital. <sup>49</sup> The nurse's sister, a number of attendees at a "hen's party", and several other contacts were subsequently infected. <sup>47</sup>                                                                                                                                                                                                                                                                                                                                                                                                                                                                                                                                                                                                                                                                                                                                                                                                                                                                                                                                                                                                                                                                     | to be "border workers" given that the hospital patients were still part of the quarantine system)  |
| Sofitel Wentworth Hotel in Sydney, NSW (March 2021)       | A single security guard                           | A security guard at the Sofitel Wentworth in Sydney tested positive for COVID-19 on 13 March through routine surveillance testing. <sup>50</sup> Genomic sequencing linked the case to a returned traveller and subsequent testing revealed that another returned traveller was also infected within the facility. <sup>50</sup>                                                                                                                                                                                                                                                                                                                                                                                                                                                                                                                                                                                                                                                                                                                                                                                                                                                                                                                                                   | Likely                                                                                             |
| <b>New Zealand</b>                                        |                                                   |                                                                                                                                                                                                                                                                                                                                                                                                                                                                                                                                                                                                                                                                                                                                                                                                                                                                                                                                                                                                                                                                                                                                                                                                                                                                                    |                                                                                                    |
| Auckland August 2020 outbreak                             | A total of 179 cases, with 3 deaths <sup>51</sup> | The cause of this outbreak remains unknown, but genomic work probably provides the best evidence to this being a border facility (isolation or quarantine facility) failure: "There are a large number of similar genomes which are from the UK, which would seem to suggest the UK is the most likely source of any unknown importation". <sup>52</sup> This was at a time when 40% of cases in NZ quarantine/isolation facilities did not have genomic work on the virus infecting them (ie, there was not enough complete virus in the samples). It was also estimated <sup>52</sup> that there was only a very tiny risk of this outbreak being a continuation of the March/April spread of the pandemic in NZ: "Our Bayesian phylogenetic analysis ... estimates that there is a 0.4% probability that case 20VR2563 is in the "sister clade" of the Auckland cluster." Finally, the chance of the outbreak being from contaminated imported food was also considered very unlikely: "Our Bayesian phylogenetic analysis ... shows that the estimated mutation rate on the branch leading to the cluster is not a lot smaller than elsewhere in the tree, lending little weight to the possibility that the virus lay dormant on packing material for a long period of time." | Unclear                                                                                            |
| Border facility maintenance worker infected (August 2020) | A single worker                                   | A shared lift environment in a quarantine hotel (the Rydges Hotel in Central Auckland was the source suspected by officials, <sup>53</sup> with the sharing being only minutes apart. <sup>52</sup> The genomic sequencing indicated the same virus infecting the worker as per a recent traveller in the same facility. <sup>52</sup>                                                                                                                                                                                                                                                                                                                                                                                                                                                                                                                                                                                                                                                                                                                                                                                                                                                                                                                                             | Likely                                                                                             |
| Border facility health worker infected (September 2020)   | A single worker                                   | This was a work-related infection associated with a hotel facility used for isolating infected cases (the Jet Park Hotel, Auckland), given that the case was linked via genomic sequencing to 3 cases within the facility. <sup>54</sup> Some details of the full investigation report were provided to the media and these suggested that while the nurse wore personal protective equipment (PPE), there was a period where the                                                                                                                                                                                                                                                                                                                                                                                                                                                                                                                                                                                                                                                                                                                                                                                                                                                  | Likely                                                                                             |

| Event                                                                      | Extent of known spread                                  | Details                                                                                                                                                                                                                                                                                                                                                                                                                                                                                                                                                                                                                                                                                                                                                                                                            | Event preventable with full vaccination of frontline border workers (assuming 100% effectiveness)? |
|----------------------------------------------------------------------------|---------------------------------------------------------|--------------------------------------------------------------------------------------------------------------------------------------------------------------------------------------------------------------------------------------------------------------------------------------------------------------------------------------------------------------------------------------------------------------------------------------------------------------------------------------------------------------------------------------------------------------------------------------------------------------------------------------------------------------------------------------------------------------------------------------------------------------------------------------------------------------------|----------------------------------------------------------------------------------------------------|
|                                                                            |                                                         | associated patient did not have a mask on during treatment. <sup>55</sup> This situation could have contributed to a failure of the PPE worn by the nurse.                                                                                                                                                                                                                                                                                                                                                                                                                                                                                                                                                                                                                                                         |                                                                                                    |
| Traveller-related outbreak / Christchurch border facility (September 2020) | The traveller and 2 others (total of 3 cases)           | This person was thought to have been infected within a hotel quarantine facility before then moving into the community, according to the Ministry of Health. <sup>56</sup> This infected traveller appears to have then infected another person (the Ministry suggest this may have occurred on a charter flight after leaving the facility). <sup>56</sup> A household contact was also reported as becoming infected. <sup>57</sup>                                                                                                                                                                                                                                                                                                                                                                              | No                                                                                                 |
| Border facility health worker (Case A) in Christchurch (November 2020)     | A single worker                                         | This was a work-related infection associated with a facility used for isolating infected cases. Both this case (and “Case B” below) had the virus genome sequencing linked to infection in a group of international mariners in the same hotel facility but with different virus subtypes in each case. <sup>53</sup> “The finding supports the current theory that there were two separate events infecting both workers at the facility.” These cases of infected health workers appear to have contributed to border control nurses threatening strike action if they were not supplied with improved PPE. <sup>27</sup> One estimate was that 12 of the mariners were infected on arrival in NZ, but with subsequent spread within the facility a total of 31 mariners were ultimately infected. <sup>58</sup> | Likely                                                                                             |
| Another border facility health worker (Case B) (see above)                 | A single worker                                         | This was a separate work-related infection associated with a border control facility – see in the row above.                                                                                                                                                                                                                                                                                                                                                                                                                                                                                                                                                                                                                                                                                                       | Likely                                                                                             |
| Defence Force worker outbreak (November 2020)                              | The worker, a co-worker and 4 others (total of 6 cases) | This was a work-related infection in a Defence Force worker associated with a hotel border facility in Auckland (used for isolating known infected cases). “The genome sequencing we have conducted on Case A’s test result shows a direct link to two travellers who are part of a family group in the quarantine facility”. <sup>59</sup> The route of transmission to one of the community cases remains a mystery (albeit they worked in the same locality within Auckland City). Associated with these cases, the Prime Minister made statements around the need for further risk reduction. <sup>60</sup>                                                                                                                                                                                                    | Likely                                                                                             |
| Traveller infectious after leaving a quarantine facility (January 2021)    | 1 traveller                                             | A traveller was identified as being infectious in the community after leaving a quarantine facility (Pullman, Auckland). The traveller reportedly had the South African variant (lineage B.1.351) of the pandemic virus. <sup>61</sup> Genome sequencing has linked this case to another traveller who was in the same facility. <sup>62</sup> The transmission mechanism has not been precisely identified with investigations still proceeding as of mid-February 2021. However,                                                                                                                                                                                                                                                                                                                                 | No                                                                                                 |

| Event                                                                   | Extent of known spread     | Details                                                                                                                                                                                                                                                                                                                                                                                                                                                                                                                                                                                                                                                                                                                                                                                                                                                                                                                                                                                       | Event preventable with full vaccination of frontline border workers (assuming 100% effectiveness)? |
|-------------------------------------------------------------------------|----------------------------|-----------------------------------------------------------------------------------------------------------------------------------------------------------------------------------------------------------------------------------------------------------------------------------------------------------------------------------------------------------------------------------------------------------------------------------------------------------------------------------------------------------------------------------------------------------------------------------------------------------------------------------------------------------------------------------------------------------------------------------------------------------------------------------------------------------------------------------------------------------------------------------------------------------------------------------------------------------------------------------------------|----------------------------------------------------------------------------------------------------|
|                                                                         |                            | officials consider it likely to have been a separate transmission event to the one in the following row.                                                                                                                                                                                                                                                                                                                                                                                                                                                                                                                                                                                                                                                                                                                                                                                                                                                                                      |                                                                                                    |
| Travelers infectious after leaving a quarantine facility (January 2021) | 2 travellers and a contact | Two travellers (a parent and child) were identified as infectious in the community after being infected with the South African variant (lineage B.1.351), of the pandemic virus with a link to a quarantine facility (Pullman, Auckland). <sup>63</sup> A close contact (the mother of the child) also became infected. <sup>64</sup> The transmission mechanism has not been precisely identified with investigations still proceeding as of mid-February 2021.                                                                                                                                                                                                                                                                                                                                                                                                                                                                                                                              | No                                                                                                 |
| MIQ workers (March 2021)                                                | 3 workers                  | A cleaner at the Grand Millennium Hotel MIQ facility in Auckland (Case A) tested positive during routine surveillance testing on 22 March 2021. <sup>65</sup> While a household contact returned a weak positive the next day, <sup>66</sup> subsequent tests were negative. <sup>67</sup> The MIQ worker had recently been vaccinated (with the Pfizer/BioNTech vaccine) on 23 February, with a second dose on 16 March, <sup>66</sup> although they tested positive before full protection from the vaccine could be expected. Their family had not yet been vaccinated. <sup>66</sup> Genome sequencing revealed that Case A was infected with the highly transmissible variant first identified in the UK (B.1.1.7) and was linked to a traveller in the facility who had arrived on 13 March. <sup>68</sup> In early April, two unvaccinated security guards at the same facility tested positive (Cases B and C) and genome sequencing linked the two cases to Case A. <sup>69,70</sup> | Likely                                                                                             |

## Approaches to managing quarantine in Australia and New Zealand

Table A2 details the various approaches to quarantine used in both countries. Key features of which are summarised below:

- The length of quarantine in all jurisdictions is 14 days.
- Almost all jurisdictions require at least two separate PCR tests for travellers: one shortly after arrival and another closer to the end of the quarantine period.
- Many jurisdictions have introduced or are considering additional tests for travellers, either earlier in (eg, Day 0/1 in New Zealand) or after (eg, Day 16 in New South Wales) the quarantine period. This is in response to concerns about new highly infectious variants in early 2021.
- Australia does not currently have a national strategy for quarantine.
- Detailed information on quarantine programs for each Australian state/territory is limited and in many cases we had to rely on news articles for additional details in compiling Table A2. Descriptions of PPE required for quarantine staff in different jurisdictions were particularly difficult to identify and information often was not available by staff role (eg, security guards vs cleaners).



**Appendix Table A2: Description of key infection control processes and surveillance at quarantine facilities in Australia and New Zealand as of 31 March 2021 (with the length of quarantine being 14 days in all jurisdictions)**

| Jurisdiction                                                                                                                                                                                                                                             | PCR testing regimen for travellers                                                                                                                                                                                                                                                                                                                                     | PCR testing regimen for staff                                                                                                                                                                                                                                                                                                              | Mask requirements for travellers (outside of rooms)                                                                                                                                          | Mask requirements for staff                                                                                                                                                                                                                                                          | Shared space restrictions                                                                                                                                                                                                      | Comments and historical changes of note                                                                                                                                                                                                                                                                                                                                                                                                                                                                                                                                                                                                            |
|----------------------------------------------------------------------------------------------------------------------------------------------------------------------------------------------------------------------------------------------------------|------------------------------------------------------------------------------------------------------------------------------------------------------------------------------------------------------------------------------------------------------------------------------------------------------------------------------------------------------------------------|--------------------------------------------------------------------------------------------------------------------------------------------------------------------------------------------------------------------------------------------------------------------------------------------------------------------------------------------|----------------------------------------------------------------------------------------------------------------------------------------------------------------------------------------------|--------------------------------------------------------------------------------------------------------------------------------------------------------------------------------------------------------------------------------------------------------------------------------------|--------------------------------------------------------------------------------------------------------------------------------------------------------------------------------------------------------------------------------|----------------------------------------------------------------------------------------------------------------------------------------------------------------------------------------------------------------------------------------------------------------------------------------------------------------------------------------------------------------------------------------------------------------------------------------------------------------------------------------------------------------------------------------------------------------------------------------------------------------------------------------------------|
| New Zealand (NZ)                                                                                                                                                                                                                                         | NZ requires evidence (with some exemptions) before boarding of an aircraft to NZ from most international locations of a COVID-19 pre-test of either a PCR (including RT-PCR), LAMP or antigen test taken 72 hours before scheduled departure (introduced between 15 and 25 January 2021). <sup>71</sup> NZ requires tests on days: 0/1 (most), 3 and 12. <sup>72</sup> | Weekly (nasopharyngeal swab) for some staff, <sup>72</sup> but with selected voluntary use of daily saliva (PCR) testing in selected locations. Staff transporting travellers to hotels are also subject to testing. <sup>72</sup> It is possible that the required testing has not been fully undertaken in some instances. <sup>73</sup> | Single-use face masks are provided to travellers and are to be used when outside of room. <sup>72</sup> They are required to be worn if someone enters a hotel room, such as during testing. | Surgical or procedure masks to be worn by staff if nearby travellers. <sup>74</sup> N95/P2 masks to be worn by staff when 2 meters physical distancing cannot be maintained by staff when nearby confirmed or probable cases of COVID-19 (effective 26 November 2020). <sup>75</sup> | There are some restrictions, with travellers in some facilities required to book allocated times to access shared spaces – but there remain shared recreational, exercise, and smoking areas in most facilities. <sup>72</sup> | The testing process has changed over time with a day 0/1 test introduced in January 2021 for travellers from most countries (excluding those from some low-risk countries). On some occasions the infection control processes in the facilities were found to be suboptimal (eg, 19 mariners infected while in one facility <sup>58</sup> ). Some facilities run daily bus trips to take travellers to outdoor exercise areas, a practice which has raised concerns from epidemiologists. Vaccination of staff was initially not required, however, if staff are not vaccinated, they will be redeployed to a non-frontline role. <sup>76 77</sup> |
| <b>Australian States and Territories</b>                                                                                                                                                                                                                 |                                                                                                                                                                                                                                                                                                                                                                        |                                                                                                                                                                                                                                                                                                                                            |                                                                                                                                                                                              |                                                                                                                                                                                                                                                                                      |                                                                                                                                                                                                                                |                                                                                                                                                                                                                                                                                                                                                                                                                                                                                                                                                                                                                                                    |
| Australia requires evidence (with some exemptions) for boarding aircraft to Australia from most international locations of a negative COVID-19 PCR test taken 72 hours or less before scheduled departure (introduced on 22 January 2021). <sup>78</sup> |                                                                                                                                                                                                                                                                                                                                                                        |                                                                                                                                                                                                                                                                                                                                            |                                                                                                                                                                                              |                                                                                                                                                                                                                                                                                      |                                                                                                                                                                                                                                |                                                                                                                                                                                                                                                                                                                                                                                                                                                                                                                                                                                                                                                    |
| Australian Capital Territory                                                                                                                                                                                                                             | ACT requires tests between days 0-2 and between days 12-13. <sup>79</sup>                                                                                                                                                                                                                                                                                              | Asymptomatic staff to be tested every 7 days. <sup>79 80</sup>                                                                                                                                                                                                                                                                             | Masks must be worn when opening hotel                                                                                                                                                        | Possible surgical mask use (as                                                                                                                                                                                                                                                       | Travelers are required to remain within their hotel                                                                                                                                                                            | To date, ACT has only accepted repatriation flights. <sup>81</sup> All front-line quarantine workers are                                                                                                                                                                                                                                                                                                                                                                                                                                                                                                                                           |



| Jurisdiction          | PCR testing regimen for travellers             | PCR testing regimen for staff                                                                                                                                                                                    | Mask requirements for travellers (outside of rooms)                                                                                                                                                      | Mask requirements for staff                                                                                                                                            | Shared space restrictions                                                                                           | Comments and historical changes of note                                                                                                                                                                                                                                                                                                                                                                                                                  |
|-----------------------|------------------------------------------------|------------------------------------------------------------------------------------------------------------------------------------------------------------------------------------------------------------------|----------------------------------------------------------------------------------------------------------------------------------------------------------------------------------------------------------|------------------------------------------------------------------------------------------------------------------------------------------------------------------------|---------------------------------------------------------------------------------------------------------------------|----------------------------------------------------------------------------------------------------------------------------------------------------------------------------------------------------------------------------------------------------------------------------------------------------------------------------------------------------------------------------------------------------------------------------------------------------------|
| (ACT)                 |                                                |                                                                                                                                                                                                                  | doors. <sup>79</sup> If sharing a hotel room and COVID-19 symptoms develop, a face mask must be worn inside the hotel room. <sup>79</sup>                                                                | suggested by photographic evidence). <sup>81</sup>                                                                                                                     | room. <sup>79</sup>                                                                                                 | required to be vaccinated for COVID-19 as a condition of employment (policy announced in late March 2021). <sup>82</sup>                                                                                                                                                                                                                                                                                                                                 |
| Queensland            | Tests required on days 2 and 11. <sup>83</sup> | Staff are required to have throat & nasal swabs or a saliva test within 7 days after commencing work at a facility, and then daily saliva testing, with rolling throat & nasal swabs every 7 days. <sup>84</sup> | Travelers are required to wear a face mask when traveling to a quarantine hotel until reaching the hotel room. <sup>85</sup> Travelers are also requested to wear masks where appropriate. <sup>86</sup> | Staff are required to wear PPE (including a surgical mask <sup>86</sup> ) when entering a traveller's room to conduct COVID-19 tests. <sup>87</sup>                    | Travelers have no access to shared facilities and are required to remain within their allocated room. <sup>87</sup> | Testing clinicians 'may' ask travellers to wear 'appropriate PPE' when being tested for COVID-19. <sup>87</sup> Testing clinicians are advised not to enter a traveller's room unless there is no other way to collect specimen. <sup>86</sup> Staff who working within direct or indirect contact are required to be vaccinated. <sup>88</sup>                                                                                                          |
| New South Wales (NSW) | Tests required on days 2 and 12. <sup>89</sup> | PCR or saliva collection: Hotel staff in quarantine facility (effective 14 December 2020) and persons providing security services to quarantine facility (effective 11 January 2021);                            | Travelers are typically not allowed outside of rooms. <sup>92</sup> Additional information was not available on mask requirements for travellers.                                                        | PPE (including a surgical mask) when conducting COVID-19 test, <sup>93</sup> cleaning rooms, <sup>94</sup> or transferring travellers and their luggage. <sup>95</sup> | No smoking, e-cigarette use, or outside exercise allowed while in hotel quarantine. <sup>89 92</sup>                | In February 2021, NSW introduced a test for travellers on day 16. <sup>37</sup> Saliva swabs are also required from the following designated quarantine facility workers once per shift, taken during shift: NSW Police Officers (effective 20 January 2021), and Healthcare staff providing medical treatment or care to a person (effective 18 January 2021). <sup>90</sup> Quarantine transport workers (effective 21 January 2021) <sup>96</sup> and |

| Jurisdiction       | PCR testing regimen for travellers                                                                                                                                   | PCR testing regimen for staff                                                                 | Mask requirements for travellers (outside of rooms)                                                                                                       | Mask requirements for staff                                                                                                                                                               | Shared space restrictions                                                                                                                                                                                                                                              | Comments and historical changes of note                                                                                                                                                                                                                                                                                                                                                                                                                                                                                                                                                                                                                                                                                                                                                                |
|--------------------|----------------------------------------------------------------------------------------------------------------------------------------------------------------------|-----------------------------------------------------------------------------------------------|-----------------------------------------------------------------------------------------------------------------------------------------------------------|-------------------------------------------------------------------------------------------------------------------------------------------------------------------------------------------|------------------------------------------------------------------------------------------------------------------------------------------------------------------------------------------------------------------------------------------------------------------------|--------------------------------------------------------------------------------------------------------------------------------------------------------------------------------------------------------------------------------------------------------------------------------------------------------------------------------------------------------------------------------------------------------------------------------------------------------------------------------------------------------------------------------------------------------------------------------------------------------------------------------------------------------------------------------------------------------------------------------------------------------------------------------------------------------|
|                    |                                                                                                                                                                      | testing taken once per shift, during shift. <sup>90 91</sup>                                  |                                                                                                                                                           |                                                                                                                                                                                           |                                                                                                                                                                                                                                                                        | designated airport workers also receive daily saliva testing. <sup>91</sup> Vaccination is not currently compulsory for staff. <sup>97</sup>                                                                                                                                                                                                                                                                                                                                                                                                                                                                                                                                                                                                                                                           |
| Northern Territory | At the Howards Springs quarantine facility travellers are tested upon arrival. <sup>98</sup> It remains unclear how many other COVID-19 tests are required and when. | Daily testing (nasal swab) of staff at Howards Springs quarantine facility. <sup>99 100</sup> | Masks provided to travellers, and must be worn when on veranda of allocated room, and when opening door of room, or going outside of room. <sup>101</sup> | Staff are required to wear PPE (including a surgical mask) when interacting with travellers, and are also required to be photographed in their PPE before starting a shift. <sup>99</sup> | There are balconies attached to each traveller's cabin for individual use, and also used during COVID-19 testing at the Howard Springs quarantine facility. <sup>100</sup> However, it is unclear whether reports of use of a swimming pool are correct. <sup>98</sup> | Managed quarantine is not undertaken in hotels and is closer to ideal in terms of ventilation and reduced shared space: <i>'In Darwin, rooms are single accommodation, with no internal connecting doors between the rooms. In Alice Springs families are accommodated in shared rooms, based on room availability at the time.'</i> <sup>101</sup> In some managed supervised quarantine locations, they do not allow for delivery services. <sup>101</sup> Movement of staff within the Howards Springs quarantine facility is restricted. <sup>99</sup> Staff buddy systems are in place, and careful monitoring of PPE use with photographs of PPE taken before each shift at Howards Springs quarantine facility. <sup>100</sup> Vaccination of staff began in late February 2021. <sup>102</sup> |
| South Australia    | Tests are required on days 0, 5, and 13. <sup>103</sup>                                                                                                              | Staff are required to have nose and throat swabs once every 8 days. <sup>104 105</sup>        | Masks must be worn when opening hotel doors. <sup>103</sup> Returned travellers are only allowed to leave their rooms in an                               | 'Hotel staff must wear appropriate PPE and maintain at least 1.5 meters                                                                                                                   | Travelers must remain within their hotel room. <sup>103</sup>                                                                                                                                                                                                          | A requirement for a day 16 test for travellers after leaving hotel quarantine may be introduced in February 2021. <sup>107</sup> Additionally, as of 8 February 2021, hotel quarantine workers were required to have daily saliva tests. <sup>107</sup>                                                                                                                                                                                                                                                                                                                                                                                                                                                                                                                                                |

| Jurisdiction | PCR testing regimen for travellers                                                                                    | PCR testing regimen for staff                                                                                                                        | Mask requirements for travellers (outside of rooms)                                                                                                                                                                                      | Mask requirements for staff                                                                                        | Shared space restrictions                                                                 | Comments and historical changes of note                                                                                                                                                                                                                                                                                                                                                                                                                                                                                                                                                        |
|--------------|-----------------------------------------------------------------------------------------------------------------------|------------------------------------------------------------------------------------------------------------------------------------------------------|------------------------------------------------------------------------------------------------------------------------------------------------------------------------------------------------------------------------------------------|--------------------------------------------------------------------------------------------------------------------|-------------------------------------------------------------------------------------------|------------------------------------------------------------------------------------------------------------------------------------------------------------------------------------------------------------------------------------------------------------------------------------------------------------------------------------------------------------------------------------------------------------------------------------------------------------------------------------------------------------------------------------------------------------------------------------------------|
|              |                                                                                                                       |                                                                                                                                                      | emergency situation.                                                                                                                                                                                                                     | distance from guests at all times'. <sup>106</sup>                                                                 |                                                                                           | Vaccination of staff is not compulsory (current as of February 2021). <sup>108</sup>                                                                                                                                                                                                                                                                                                                                                                                                                                                                                                           |
| Tasmania     | Tests are required within 48 hours of entering quarantine and after day 10 of the quarantine period. <sup>109</sup>   | Staff must get tested every 5 to 8 days after their first shift, then tested every 5 to 8 days, until 14 days after their last shift. <sup>110</sup> | Required to wear a facemask when travelling to quarantine hotel and if leaving the hotel room for an approved purpose (such as seeking medical care) a face mask must be worn at all times (unless an exemption applies). <sup>109</sup> | Transport, security, and health officials involved in hotel quarantine will have 'appropriate PPE'. <sup>111</sup> | Travelers must remain within their hotel room. <sup>109</sup>                             | Hotel quarantine workers given wage supplements to prevent them taking second jobs in effort to reduce risk of COVID-19 transmission – December 2020. <sup>112</sup> Workers at government-designated quarantine sites must undertake saliva screening once per shift. <sup>110</sup> Vaccination of staff is prioritized in Tasmania, and currently not compulsory. <sup>113</sup>                                                                                                                                                                                                            |
| Victoria     | Tests are required within 24 hours of arrival in Victoria, as well as on (or about) days 4, 12 and 14. <sup>114</sup> | Daily testing is required for staff (even on days off). <sup>21 115</sup>                                                                            | Travelers are not allowed to leave their rooms unless there is an emergency. <sup>21</sup> Travelers must wear masks when opening the doors to collect their food.                                                                       | Full PPE is required for staff while on shift.                                                                     | There are no shared spaces; returned travellers must remain in their rooms. <sup>21</sup> | After the significant failure that led to over 19,800 cases, and over 800 deaths, Victoria began welcoming returned travellers in December with a revamped hotel quarantine system which included a number of improvements, such as daily testing of staff, voluntary regular testing of family members of staff, advanced contact tracing, a ban on secondary face-to-face employment for key staff, strengthened PPE protocols, and dedicated 'health hotels' for positive and suspected cases and their close contacts. <sup>21</sup> All front-line staff were to be vaccinated with first |

| Jurisdiction      | PCR testing regimen for travellers                                                | PCR testing regimen for staff                                                                                                                                  | Mask requirements for travellers (outside of rooms)                                                                                                                     | Mask requirements for staff                                                                                                                                                                                    | Shared space restrictions                                                                                                                                                 | Comments and historical changes of note                                                                                                                                                                                                                                                                                                                                                                      |
|-------------------|-----------------------------------------------------------------------------------|----------------------------------------------------------------------------------------------------------------------------------------------------------------|-------------------------------------------------------------------------------------------------------------------------------------------------------------------------|----------------------------------------------------------------------------------------------------------------------------------------------------------------------------------------------------------------|---------------------------------------------------------------------------------------------------------------------------------------------------------------------------|--------------------------------------------------------------------------------------------------------------------------------------------------------------------------------------------------------------------------------------------------------------------------------------------------------------------------------------------------------------------------------------------------------------|
|                   |                                                                                   |                                                                                                                                                                |                                                                                                                                                                         |                                                                                                                                                                                                                |                                                                                                                                                                           | dose by early April. <sup>116</sup>                                                                                                                                                                                                                                                                                                                                                                          |
| Western Australia | Tests are required within 24 hours of arrival and again on day 12. <sup>117</sup> | Staff must undergo a nose & throat PCR test every 7 days along with a daily self-collected mouth swab PCR test, effective from 31 January 2021. <sup>118</sup> | Travellers are required to wear masks when opening hotel room door (must be put on 2 minutes before opening door). <sup>119</sup> Travelers must remain in their rooms. | Hotel quarantine security staff in Perth were not required to wear masks up to early February 2021, <sup>120</sup> however masks and eye protection are now required (from late February 2021). <sup>121</sup> | Individuals in quarantine are required to remain in their hotel room; any exercise must be done inside the hotel room and no smoking is allowed in hotels. <sup>117</sup> | Previous PCR testing from 8 January 2021 for staff only required testing every 7 days and no daily mouth swab. <sup>118</sup> Certain hotel quarantine workers, including security guards, cleaners, and catering staff, have been given a 40% wage increase and are no longer allowed to hold a second job. <sup>42</sup> There are possible plans to make vaccination compulsory for staff. <sup>122</sup> |

## References

1. Baker M, Wilson N, Blakely T. Elimination may be the optimal response strategy for covid-19 and other emerging pandemic diseases. *BMJ* 2020;371:m4907. doi: 10.1136/bmj.m4907.
2. World Health Organization. Considerations for quarantine of contacts of COVID-19 cases: Interim guidance. 2020. Available from: [https://www.who.int/publications/i/item/considerations-for-quarantine-of-individuals-in-the-context-of-containment-for-coronavirus-disease-\(covid-19\)2020](https://www.who.int/publications/i/item/considerations-for-quarantine-of-individuals-in-the-context-of-containment-for-coronavirus-disease-(covid-19)2020).
3. Ritchie H, Ortiz-Ospina E, Beltekian D, et al. New Zealand: Coronavirus Pandemic Country Profile Published online at OurWorldInData.org2021. [updated 22 April 2021]. Available from: <https://ourworldindata.org/coronavirus/country/new-zealand?country=NZL~AUS> accessed 22 April 2021.
4. Ministry of Health. COVID-19: Vaccine data 2021. [updated 21 April 2021]. Available from: <https://www.health.govt.nz/our-work/diseases-and-conditions/covid-19-novel-coronavirus/covid-19-data-and-statistics/covid-19-vaccine-data> accessed 22 April 2021.
5. Ilanbey S, Dexter R, Estcourt D. All Victorian frontline hotel quarantine workers to be vaccinated by Thursday *The Age* 2021 (5 April). Available from: <https://www.theage.com.au/national/victoria/no-new-local-covid-19-cases-as-calls-grow-for-mass-vaccination-centres-to-be-fast-tracked-20210405-p57ghc.html>.
6. Toole M. More than a dozen COVID leaks in 6 months: to protect Australians, it's time to move quarantine out of city hotels. *The Conversation* 2021 (29 April). Available from: <https://theconversation.com/more-than-a-dozen-covid-leaks-in-6-months-to-protect-australians-its-time-to-move-quarantine-out-of-city-hotels-159808>.
7. Ministry of Business Innovation & Employment. Managed isolation and quarantine data. New Zealand; 2021. Available from: <https://www.mbie.govt.nz/business-and-employment/economic-development/covid-19-data-resources/managed-isolation-and-quarantine-data/> accessed 11 January 2021.
8. Ministry of Health. COVID-19: Case demographics 2021. [updated 20 January 2021]. Available from: <https://www.health.govt.nz/our-work/diseases-and-conditions/covid-19-novel-coronavirus/covid-19-data-and-statistics/covid-19-case-demographics>.
9. Australian Bureau of Statistics. Overseas Travel Statistics, Provisional (Released 18 January 2021). <https://www.abs.gov.au/statistics/industry/tourism-and-transport/overseas-travel-statistics-provisional/latest-release>.
10. Australian Department of Health. Coronavirus (COVID-19) common operating picture (Accessed 15 January 2020). Available from: <https://www.health.gov.au/resources/collections/coronavirus-covid-19-common-operating-picture>.
11. O'Brien J, Monteiro C, Rezny M, et al. COVID-19 in Australia 2021. [updated 22 April 2021]. Available from: <https://www.theage.com.au/national/victoria/three-new-covid-19-cases-linked-to-holiday-inn-cluster-emerge-20210219-p573wq.html> accessed 22 April 2021.
12. Northern Territory Government. Mandatory supervised quarantine for repatriated Australians. 2020. Available from: <https://coronavirus.nt.gov.au/travel/quarantine/mandatory-supervised-quarantine-for-repatriated-australians> accessed 12 January 2021.
13. Baden LR, El Sahly HM, Essink B, et al. Efficacy and Safety of the mRNA-1273 SARS-CoV-2 Vaccine. *The New England journal of medicine* 2021;384(5):403-16. doi: 10.1056/NEJMoa2035389

14. Brouwer PJM, Brinkkemper M, Maisonnasse P, et al. Two-component spike nanoparticle vaccine protects macaques from SARS-CoV-2 infection. *Cell* 2021;184(5):1188-200 e19. doi: 10.1016/j.cell.2021.01.035 [published Online First: 2021/02/13]
15. Geoghegan JL, Ren X, Storey M, et al. Genomic epidemiology reveals transmission patterns and dynamics of SARS-CoV-2 in Aotearoa New Zealand. *Nature communications* 2020;11(1):6351-7. doi: 10.1038/s41467-020-20235-8
16. COVID research updates: 7 January — Evidence grows of a new coronavirus variant’s swift spread. *Nature* 2021 (8 January) Available from: <https://www.nature.com/articles/d41586-020-00502-w>.
17. Voysey M, Costa Clemens S, Madhi SA, et al. Single Dose Administration, And The Influence Of The Timing of The Booster Dose On Immunogenicity And Efficacy Of ChAdOx1 nCoV-19 (AZD1222) Vaccine. *The Lancet* (preprint posted 1 Feb 2021)
18. Emary KRW, Golubchik T, Aley PK, et al. Efficacy of ChAdOx1 nCoV-19 (AZD1222) vaccine against SARS-CoV-2 variant of concern 202012/01 (B.1.1.7): an exploratory analysis of a randomised controlled trial. *The Lancet* 2021;397(10282):1351-62. doi: 10.1016/S0140-6736(21)00628-0
19. Covid-19: Why Australia’s quarantine rules are changing. *Radio New Zealand* 2021. Available from: <https://www.rnz.co.nz/news/world/434278/covid-19-why-australia-s-quarantine-rules-are-changing>.
20. Morrah M. Revealed: The strict new coronavirus rules for New Zealand's COVID-19 Defence Force staff. *Newshub* 2020 (25 November). Available from: <https://www.newshub.co.nz/home/new-zealand/2020/11/revealed-the-strict-new-coronavirus-rules-for-new-zealand-s-covid-19-defence-force-staff.html>.
21. Premier of Victoria. A Stronger Quarantine Program To Protect What We’ve Built [press release]. 30 November 2020. Available from: <https://www.premier.vic.gov.au/stronger-quarantine-program-protect-what-weve-built2020>.
22. Cheng D. Watch: Covid Response Minister Chris Hipkins reveals travel ban for ‘very high risk countries’. *NZ Herald* 2021 (23 April). Available from: <https://www.nzherald.co.nz/nz/watch-covid-response-minister-chris-hipkins-reveals-travel-ban-for-very-high-risk-countries/ZRZAJIGZ6Q3OBWPX6C2ZB7BLPM/>.
23. Wilson N, Baker M. New Zealand needs a ‘traffic light’ system to stop COVID-19 creeping in at the border. *The Conversation* 2020 (4 November). Available from: <https://theconversation.com/new-zealand-needs-a-traffic-light-system-to-stop-covid-19-creeping-in-at-the-border-149262>.
24. Swadi T, Geoghegan JL, Devine T, et al. Genomic Evidence of In-Flight Transmission of SARS-CoV-2 Despite Predeparture Testing. *Emerg Infect Dis* 2021;27(3) doi: 10.3201/eid2703.204714 [published Online First: 2021/01/06]
25. Cheng D. Covid 19 coronavirus: Chafing under the rules - 76 bubble breaches in four months. *New Zealand Herald* 2020 (28 November) .Available from: <https://www.nzherald.co.nz/nz/covid-19-coronavirus-chafing-under-the-rules-76-bubble-breaches-in-four-months/5WL0DXO7S4SBCZY7UWBWKSZOU/>.
26. Zhang L, Tao Y, Zhuang G, et al. Characteristics Analysis and Implications on the COVID-19 Reopening of Victoria, Australia. *The Innovation* 2020;1(3):100049. doi: 10.1016/j.xinn.2020.100049
27. Department of Health and Human Services State Government of Victoria. Tracking coronavirus in Victoria 2020; cited 2021. Available from: <https://www.dhhs.vic.gov.au/tracking-coronavirus-victoria>.

28. SA Health. COVID-19 update 22 December 2020 [press release]. 2020. Available from: <https://www.sahealth.sa.gov.au/wps/wcm/connect/public+content/sa+health+internet/abou+us/news+and+media/all+media+releases/covid-19+update+22+december+20202020>.
29. Board of Inquiry into the COVID-19 Hotel Quarantine Program. COVID-19 Hotel Quaranting Inquiry Final Report and Recommendations, Volume 1: Victorian Government Printer, 2020.
30. Taylor J. Hotel quarantine linked to 99% of Victoria's Covid cases, inquiry told. *The Guardian* 2020 (18 August). Available from: <https://www.theguardian.com/australia-news/2020/aug/18/hotel-quarantine-linked-to-99-of-victorias-covid-cases-inquiry-told>.
31. Mercer P. Covid: Melbourne's hard-won success after a marathon lockdown. *BBC News* 2020 (26 October). Available from: [www.bbc.com/news/world-australia-54654646](http://www.bbc.com/news/world-australia-54654646).
32. Coronavirus hotel quarantine workers have become infected since Victoria's program was reset. Should you be worried? *ABC News* 2020. Available from: <https://www.abc.net.au/news/2020-10-03/victoria-hotel-quarantine-staff-infections-is-enough-being-done/12727050>.
33. Lucas C. Stamford hotel blames government and guards for outbreak. *The Age* 2020 (2 July). Available from: <https://www.theage.com.au/politics/victoria/stamford-hotel-blames-government-and-guards-for-outbreak-20200702-p558e6.html>.
34. NSW coronavirus investigation after Sydney hotel quarantine security guard tests positive. *ABC News* 2020 (18 August). Available from: <https://www.abc.net.au/news/2020-08-18/nsw-coronavirus-hotel-quarantine-security-guard-investigated/12570336>.
35. Aubusson K, Chung L. Australian health authorities racing to contain cluster as NSW records 14 new covid-19 cases. *Stuff* 2020 (29 August). Available from: <https://www.stuff.co.nz/world/australia/300094865/australian-health-authorities-racing-to-contain-cluster-as-nsw-records-14-new-covid19-cases>.
36. Tsirtsakis A. Is it time for a national approach to hotel quarantine? *newsGP* 2020. Available from: <https://www1.racgp.org.au/newsgp/clinical/is-it-time-for-a-national-approach-to-hotel-quaran>.
37. NSW Health. Covid-19 weekly surveillance in NSW: Epidemiological week 52, ending 26 December 2020. 2021. Available from: <https://www.health.nsw.gov.au/Infectious/covid-19/Documents/covid-19-surveillance-report-20201226.pdf2021>.
38. Lathouris O. Berala cluster: Sydney COVID outbreak linked to BWS where two infected staff worked throughout Christmas. *Nine News* 2021. Available from: <https://www.9news.com.au/national/coronavirus-nsw-update-berala-bws-cluster-not-linked-to-avalon-sydney-northern-beaches-covid19-strain-genomic-testing-finds/26e4bfd0-df34-42d6-852c-5ac774bc8a11>.
39. Queensland Health. Incident response set up following confirmation of Brisbane hotel cluster [press release]. 13 January 2021. Available from: <https://www.health.qld.gov.au/news-events/doh-media-releases/releases/incident-response-set-up-following-confirmation-of-brisbane-hotel-cluster2021>.
40. Quarantine hotel worker tests positive to coronavirus in Brisbane. *ABC News* 2021. Available from: <https://www.abc.net.au/news/2021-01-07/coronavirus-queensland-quarantine-hotel-worker-tests-positive/13034046>.
41. Queensland Government. Greater Brisbane 3-day lockdown 2021. Available from: <https://www.qld.gov.au/health/conditions/health-alerts/coronavirus-covid-19/current-status/greater-brisbane-lockdown>.

42. Manfield E. WA coronavirus hotel quarantine security companies agree to ban on second jobs. *ABC News* 2021 (10 February). Available from: <https://www.abc.net.au/news/2021-02-10/wa-hotel-quarantine-security-guards-to-end-second-jobs-next-week/13139172>.
43. Hendrie D. Latest hotel quarantine leak proves 'we're not learning'. *news GP* 2021 (1 February). Available from: <https://www1.racgp.org.au/newsgp/clinical/latest-hotel-quarantine-leak-proves-we-re-not-lear>.
44. Woodley M. National Cabinet strengthens Australia's border controls. *news GP* 2021 (8 January). Available from: <https://www1.racgp.org.au/newsgp/clinical/national-cabinet-strengthens-australia-s-border-co>.
45. No new local cases in Victoria, amid hotel quarantine leak. *The New Daily* 2021. Available from: <https://thenewdaily.com.au/news/coronavirus/2021/02/05/hotel-quarantine-victoria-zero/>.
46. Estcourt D, Sakal P. One in intensive care as Holiday Inn COVID-19 cluster grows to 22. *The Age* 2021 (19 February). Available from: <https://www.theage.com.au/national/victoria/three-new-covid-19-cases-linked-to-holiday-inn-cluster-emerge-20210219-p573wq.html>.
47. Motherwell S. How two clusters from one hospital triggered the Brisbane lockdown. *ABC News* 2021 (30 March). Available from: <https://www.abc.net.au/news/2021-03-30/brisbane-lockdown-clusters-coronavirus-explained-pa-hospital/100037608>.
48. Queensland Health. Historic case linked to Brisbane COVID-19 cluster [press release]. 11 April 2021. Available from: <https://www.health.qld.gov.au/news-events/doh-media-releases/releases/historic-case-linked-to-brisbane-covid-19-cluster> accessed 22 April 2021 Access 2021.
49. Queensland Health. Brisbane COVID-19 clusters explained [press release]. 30 March 2021. Available from: <https://www.health.qld.gov.au/news-events/doh-media-releases/releases/brisbane-covid-19-clusters-explained> accessed 22 April 2021 Access 2021.
50. Kontominas B. NSW quarantine hotel worker tests positive to coronavirus. *ABC News* 2021 (14 March). Available from: <https://www.abc.net.au/news/2021-03-14/nsw-records-one-new-covid-19-case-in-hotel-quarantine-worker/13246856>.
51. Ministry of Health. COVID-19: Source of cases 2021. [updated 20 January 2021]. Available from: <https://www.health.govt.nz/our-work/diseases-and-conditions/covid-19-novel-coronavirus/covid-19-data-and-statistics/covid-19-source-cases>.
52. Hadfield J, Douglas J, Geoghegan J, et al. Re-emergence of community transmission in Aotearoa New Zealand - Genomic overview of the Auckland Outbreak. (Accessed 28 October 2020). ESR. <https://nextstrain.org/community/narratives/ESR-NZ/GenomicsNarrativeSARSCoV2/2020-10-01?n=5>.
53. Ministry of Health. 1 case of COVID-19 in quarantine worker [press release]. New Zealand, 7 November 2020. Available from: <https://www.health.govt.nz/news-media/media-releases/1-case-covid-19-quarantine-worker2020>.
54. Ministry of Health. 1 new case of COVID-19 [press release]. New Zealand, 14 September 2020. Available from: <https://www.health.govt.nz/news-media/media-releases/1-new-case-covid-19-182020>.
55. Quinn R. Covid-infected nurse 'did everything right', report finds. *Radio New Zealand* 2020 (6 November). Available from: <https://www.rnz.co.nz/news/national/429973/covid-infected-nurse-did-everything-right-report-finds>.



56. Ministry of Health. No new cases of COVID-19 [press release]. New Zealand, 2 October 2020. Available from: <https://www.health.govt.nz/news-media/media-releases/no-new-cases-covid-19-502020>.
57. Ministry of Health. 2 new cases of COVID-19 [press release]. New Zealand, 27 September 2020. Available from: <https://www.health.govt.nz/news-media/media-releases/2-new-cases-covid-19-212020>.
58. Canterbury District Health Board. International Mariners Quarantine: Summary of official information request (page updated 22 January 2021). <https://www.cdhb.health.nz/about-us/document-library/international-mariners-quarantine/>.
59. Ministry of Health. 4 new cases of COVID-19 in managed isolation [press release]. New Zealand, 9 November 2020. Available from: <https://www.health.govt.nz/news-media/media-releases/4-new-cases-covid-19-managed-isolation2020>.
60. Cheng D. Covid 19 coronavirus: Jacinda Ardern's immediate moves to minimise risk for MIQ workers. *New Zealand Herald* 2020 (9 November). Available from: <https://www.nzherald.co.nz/nz/politics/covid-19-coronavirus-jacinda-arderns-immediate-moves-to-minimise-risk-for-miq-workers/ZGJEQB77N6Z3JIFUY3KMJJSETU/>.
61. Ministry of Health. 2 cases of COVID-19 in managed isolation; update on Northland case [press release]. New Zealand, 26 January 2021. Available from: <https://www.health.govt.nz/news-media/media-releases/2-cases-covid-19-managed-isolation-update-northland-case2021>.
62. Ministry of Health. Update on Northland case, and 6 cases of COVID-19 in managed isolation [press release]. New Zealand, 25 January 2021. Available from: <https://www.health.govt.nz/news-media/media-releases/update-northland-case-and-6-cases-covid-19-managed-isolation2021>.
63. Ministry of Health. 3 new cases of COVID-19 at the border and an update on border-related cases in Auckland [press release]. New Zealand 28 January 2021. Available from: <https://www.health.govt.nz/news-media/media-releases/3-new-cases-covid-19-border-and-update-border-related-cases-auckland2021>.
64. Ministry of Health. 7 new cases of COVID-19 [press release]. New Zealand, 4 February 2021. Available from: <https://www.health.govt.nz/news-media/media-releases/7-cases-covid-19.2021>.
65. Ministry of Health. Ministry reporting positive COVID-19 case at the border [press release]. 22 March 2021. Available from: <https://www.health.govt.nz/news-media/media-releases/ministry-reporting-positive-covid-19-case-border2021>.
66. Covid-19: MIQ worker's family returns three negative, one weak positive result - Hipkins. *Radio New Zealand* 2021 (23 March). Available from: <https://www.rnz.co.nz/news/covid-19/438962/covid-19-miq-worker-s-family-returns-three-negative-one-weak-positive-result-hipkins>.
67. Ministry of Health. No new community cases; 3 cases of COVID-19 in managed isolation [press release]. 26 March 2021. Available from: <https://www.health.govt.nz/news-media/media-releases/no-new-community-cases-3-cases-covid-19-managed-isolation-02021>.
68. Ministry of Health. One new border-related case; 19 cases of COVID-19 in managed isolation; 4 historical cases [press release]. 8 April 2021. Available from: <https://www.health.govt.nz/news-media/media-releases/one-new-border-related-case-19-cases-covid-19-managed-isolation-4-historical-cases2021>.
69. Ministry of Health. No new community cases; 7 cases of COVID-19 in managed isolation; 1 historical case [press release]. 12 April 2021. Available from:

- <https://www.health.govt.nz/news-media/media-releases/no-new-community-cases-7-cases-covid-19-managed-isolation-1-historical-case2021>.
70. Ministry of Health. New border-related positive COVID-19 case [press release]. 11 April 2021. Available from: <https://www.health.govt.nz/news-media/media-releases/new-border-related-positive-covid-19-case2021>.
  71. Unite against COVID-19. Pre-departure testing for arrivals into New Zealand: New Zealand Government; 2021. Available from: <https://covid19.govt.nz/travel-and-the-border/travel-to-new-zealand/pre-departure-testing-for-arrivals-into-new-zealand/#approved-test-results-and-certificates> accessed 10 February 2021.
  72. Ministry of Business Innovation & Employment. Briefing for Incoming Minister COVID-19 Response: managed Isolation and Quarantine (MIQ) Wellington, New Zealand: New Zealand Government; 2020. Available from: <https://www.beehive.govt.nz/sites/default/files/2020-12/MIQ.pdf> accessed 16 February 2021.
  73. Manch T. Covid-19: Infected MIQ worker hadn't been tested since November. *Stuff* 2021 (14 April). Available from: <https://www.stuff.co.nz/national/politics/124830853/covid19-infected-miq-worker-hadnt-been-tested-since-november>.
  74. Ministry of Business Innovation & Employment. Welcome Pack: Managed isolation facility for returnees to New Zealand Version 5.4 Wellington, New Zealand: New Zealand Government; 2020. Available from: <https://www.miq.govt.nz/assets/MIQ-documents/miq-welcome-pack-english.pdf> accessed 16 February 2021.
  75. Ministry of Health. Further guidance on N95 masks for MIQ workers [press release]. Wellington, New Zealand 2020. Available from: <https://www.health.govt.nz/news-media/media-releases/further-guidance-n95-masks-miq-workers> accessed 16 February 2021 Access 2020.
  76. Ministry of Health. COVID-19 vaccine: FAQs 2021. Available from: <https://www.health.govt.nz/system/files/documents/pages/covid-19-vaccine-faqs3-border-miq-workers.pdf> accessed 19 April 2021.
  77. Patterson J. Unvaccinated border workers to be barred from frontline roles. *Radio New Zealand* 2021 (26 March). Available from: <https://www.rnz.co.nz/news/political/439187/unvaccinated-border-workers-to-be-barred-from-frontline-roles>.
  78. Department of Home Affairs. What I need to do before I travel: Australian Government; 2021. Available from: <https://covid19.homeaffairs.gov.au/before-i-travel> accessed 10 February 2021.
  79. ACT Government. Quarantine Information for overseas travellers entering the ACT on government facilitated flights: ACT Government; 2021. Available from: <https://www.covid19.act.gov.au/stay-safe-and-healthy/quarantine-and-isolation/quarantine-information-for-other-travellers-and-close-contacts> accessed 19 April 2021.
  80. Lewis K. Canberra hotel quarantine workers to be tested for COVID-19 weekly. *The Canberra Times* 2020 (23 November). Available from: <https://www.canberratimes.com.au/story/7023483/new-testing-regime-for-act-hotel-quarantine-workers-ahead-of-next-flight/>.
  81. White D. ACT police investigating possible breach of hotel quarantine. *The Canberra Times* 2020 (9 December). Available from: <https://www.canberratimes.com.au/story/7048737/act-police-investigating-possible-breach-of-hotel-quarantine/>.

82. Lewis K. Mandatory vaccine for ACT hotel quarantine workers. *The Canberra Times* 2021 (1 April). Available from: <https://www.canberratimes.com.au/story/7193064/mandatory-vaccine-for-act-hotel-quarantine-workers/>.
83. Queensland Health. My 14 days in a Cairns quarantine hotel [press release]. 17 September 2020. Available from: [https://www.health.qld.gov.au/cairns\\_hinterland/our-news/news-stories/what-is-it-actually-like-to-stay-in-a-quarantine-hotel-for-two-weeks2020](https://www.health.qld.gov.au/cairns_hinterland/our-news/news-stories/what-is-it-actually-like-to-stay-in-a-quarantine-hotel-for-two-weeks2020).
84. Queensland Health. Operational protocol for COVID-19 testing of quarantine facility workers and other requirements (version 4) Queensland: Queensland Government; 2021. [updated 6 April 2021]. Available from: <https://www.health.qld.gov.au/system-governance/legislation/cho-public-health-directions-under-expanded-public-health-act-powers/covid-19-testing-for-quarantine-facility-workers-direction/operational-protocol> accessed 19 April 2021.
85. Queensland Government. Face masks - coronavirus (COVID-19) Queensland: Queensland Government; 2021. Available from: <https://www.qld.gov.au/health/conditions/health-alerts/coronavirus-covid-19/protect-yourself-others/face-masks> accessed 11 February 2021.
86. Queensland Health. Infection control advice for specimen collection in hotel quarantine Queensland: Queensland Government; 2021. Available from: [https://www.health.qld.gov.au/data/assets/pdf\\_file/0014/1022018/infection-control-hotel-quarantine.pdf](https://www.health.qld.gov.au/data/assets/pdf_file/0014/1022018/infection-control-hotel-quarantine.pdf) accessed 11 February 2021.
87. Queensland Government. Quarantine in government arranged accommodation Queensland: Queensland Government; 2021. Available from: <https://www.qld.gov.au/health/conditions/health-alerts/coronavirus-covid-19/protect-yourself-others/quarantine/hotel-quarantine> accessed 11 February 2021.
88. Queensland Government. Requirements for quarantine facility workers 2021. [updated 6 April 2021]. Available from: <https://www.qld.gov.au/health/conditions/health-alerts/coronavirus-covid-19/current-status/public-health-directions/covid-19-testing-for-quarantine-facility-workers> accessed 19 April 2021.
89. NSW Health. COVID-19: Information for people requiring hotel quarantine: NSW Government; 2021. Available from: <https://www.health.nsw.gov.au/Infectious/factsheets/Pages/hotel-quarantine.aspx> accessed 10 February 2021.
90. NSW Health. NSW hotel quarantine worker surveillance and testing program: NSW Government; 2021. Available from: <https://www.health.nsw.gov.au/Infectious/covid-19/Pages/saliva-testing.aspx> accessed 10 February 2021.
91. NSW Health. NSW quarantine worker surveillance and testing program: NSW Government; 2021. [updated 29 March 2021]. Available from: <https://www.health.nsw.gov.au/Infectious/covid-19/Pages/saliva-testing.aspx> accessed 19 April 2021.
92. Davey M. Hotel quarantine a 'disaster' and vulnerable people should be allowed home, doctor says. *The Guardian* 2020 (4 April). Available from: <https://www.theguardian.com/world/2020/apr/05/hotel-quarantine-a-disaster-and-vulnerable-people-should-be-allowed-home-doctor-says>.
93. NSW Health. COVID-19: Updated advice for health professionals as of 3 February 2021 2021. Available from: <https://www.health.nsw.gov.au/Infectious/covid-19/Pages/advice-for-professionals.aspx>.
94. NSW Health. Guidance for managers and staff at hotels and other accommodation facilities hosting people in COVID-10 quarantine isolation 2021. [updated 24 August 2020]. Available from: <https://www.health.nsw.gov.au/Infectious/covid-19/Pages/hotels-accommodation.aspx>.

95. Clinical Excellence Commission. PPE and Luggage Handling in Quarantine Hotels. Government N; 2020. Available from: [https://www.cec.health.nsw.gov.au/\\_data/assets/pdf\\_file/0008/623933/COVID-19-IPC-PPE-and-Luggage-Handling-in-Quarantine-Hotels.pdf2020](https://www.cec.health.nsw.gov.au/_data/assets/pdf_file/0008/623933/COVID-19-IPC-PPE-and-Luggage-Handling-in-Quarantine-Hotels.pdf2020).
96. Scott S. NSW tightening protocols on hotel quarantine drivers to stop COVID-19 spread Australia: Australian Broadcasting Corporation; 2021. Available from: <https://www.abc.net.au/news/2021-01-07/coronavirus-testing-for-hotel-quarantine-drivers-and-transport/13037400> accessed 10 February 2021.
97. NSW Health. COVID-19 vaccination: information for NSW healthcare workers: NSW Government; 2021. [updated 12 April 2021]. Available from: <https://www.health.nsw.gov.au/Infectious/covid-19/vaccine/Pages/healthcare-workers.aspx#mandatory> accessed 19 April 2021.
98. Lackley B. Instagram vs reality: New images from inside Darwin's grim quarantine zone show how conditions at the facility are a far cry from celebrities' social media boasts - as other states push to use similar camps for returning travellers Australia: Daily Mail: Australia; 2021. Available from: <https://www.dailymail.co.uk/news/article-9149085/Inside-Howard-Springs-hotel-quarantine-facility-Darwin.html> accessed 11 February 2021.
99. Bardon J. Inside the Howard Springs quarantine facility Australia: ABC News; 2021. Available from: <https://www.abc.net.au/news/2021-01-15/inside-the-howard-springs-quarantine-facility/13062406?nw=0> accessed 11 February 2021.
100. Bardon J. In Darwin's international arrival quarantine facility, strict daily routines stop COVID-19's spread Australia: ABC News; 2021. Available from: <https://www.abc.net.au/news/2021-01-15/inside-darwin-covid-international-quarantine-landing-pad/13055008> accessed 11 February 2021.
101. Northern Territory Government. Mandatory Supervised Quarantine Northern Territory: Northern Territory Government; 2020. Available from: <https://coronavirus.nt.gov.au/travel/quarantine/mandatory-supervised-quarantine> accessed 11 February 2021.
102. Bunch A. COVID vaccines land in Northern Territory. *The West Australian* 2021 (21 February). Available from: <https://www.health.nsw.gov.au/Infectious/covid-19/vaccine/Pages/healthcare-workers.aspx#mandatory>.
103. South Australia Government. COVID-19 information: International arrivals to South Australia 2021. [updated 16 April 2021]. Available from: [https://www.covid-19.sa.gov.au/\\_data/assets/pdf\\_file/0006/376107/20210416-International-Arrivals-FAQs.pdf](https://www.covid-19.sa.gov.au/_data/assets/pdf_file/0006/376107/20210416-International-Arrivals-FAQs.pdf) accessed 19 April 2021.
104. Dornin T. SA begins daily testing for hotel workers: Victo Harbor Times; 2021. Available from: <https://www.victorharbortimes.com.au/story/7116585/sa-begins-daily-testing-for-hotel-workers/?cs=9397> accessed 11 February 2021.
105. Government of South Australia. Emergency Management (Supervised Quarantine No 3) (COVID-19) Direction 2021, 2021.
106. South Australia Health. COVID-19 Accommodation Services Fact Sheet South Australia: Government of South Australia; 2021. Available from: <https://www.sahealth.sa.gov.au/wps/wcm/connect/ffb5f26c-80cd-4284-abf8-ee78e49c58c7/Accommodation+services+fact+sheet+v1.4+%2818.01.2021%29+FINAL.pdf?MOD=AJPERES&CACHEID=ROOTWORKSPACE-ffb5f26c-80cd-4284-abf8-ee78e49c58c7-nsy8oET> accessed 11 February 2021.

107. 9News Staff. Changes to South Australia's hotel quarantine program come into force: 9News; 2021. Available from: <https://www.9news.com.au/national/south-australia-hotel-quarantine-changes-saliva-test-for-workers/8da174f9-eec5-4ea3-a40f-f2a91554efec> accessed 11 February 2021.
108. SA Health. Immunisation for Health Care Workers and Quarantine Workers Policy Version 2.0 Adelaide, SA2021. [updated 18 February 2021]. Available from: [https://www.sahealth.sa.gov.au/wps/wcm/connect/b65b12804f0cbdd29178b7791a12b24c/Policy Immunisation for Health Care Workers and Quarantine Workers Policy 18.02.2021.pdf?MOD=AJPERES&CACHEID=ROOTWORKSPACE-b65b12804f0cbdd29178b7791a12b24c-nxyo8Vp](https://www.sahealth.sa.gov.au/wps/wcm/connect/b65b12804f0cbdd29178b7791a12b24c/Policy%20Immunisation%20for%20Health%20Care%20Workers%20and%20Quarantine%20Workers%20Policy%2018.02.2021.pdf?MOD=AJPERES&CACHEID=ROOTWORKSPACE-b65b12804f0cbdd29178b7791a12b24c-nxyo8Vp) accessed 19 April 2021.
109. Tasmania Department of Public Health. Quarantine Tasmania: Tasmanian Government; 2021. Available from: <https://coronavirus.tas.gov.au/travellers-and-visitors/quarantine> accessed 10 February 2021.
110. Tasmanian Government. Testing for COVID-19 Tasmania: Tasmanian Government; 2021. Available from: <https://coronavirus.tas.gov.au/keeping-yourself-safe/testing-for-covid19> accessed 19 April 2021.
111. Premier of Tasmania. Supporting Tasmanian quarantine hotel workers to keep our community safe [press release]. 6 December 2020. Available from: <https://coronavirus.tas.gov.au/media-releases/supporting-tasmanian-quarantine-hotel-workers-to-keep-our-community-safe2020>.
112. Holmes A. Hotel quarantine workers in Tasmania to be given wage supplements to avoid second jobs Tasmania: The Examiner; 2020. Available from: <https://www.examiner.com.au/story/7042686/wage-supplements-for-hotel-quarantine-workers/> accessed 10 February 2021.
113. Tasmanian Government. FAQs 2021. [updated 19 April 2021]. Available from: <https://coronavirus.tas.gov.au/vaccination-information/covid-19-vaccination/faqs> accessed 19 April 2021.
114. Government of Victoria. Mandatory quarantine for returned overseas travellers 2021. [updated 9 April 2021]. Available from: <https://www.coronavirus.vic.gov.au/mandatory-quarantine-returned-overseas-travellers> accessed 19 April 2021.
115. Visontay E. Victoria to test hotel quarantine staff daily after worker's mystery Covid case. *The Guardian* 2021 (8 February). Available from: <https://www.theguardian.com/australia-news/2021/feb/08/victoria-to-test-hotel-quarantine-staff-daily-after-workers-mystery-covid-case>.
116. Godde C. Vic hotel staff vaccine pledge for restart. *The West Australian* 2021 (5 April). Available from: <https://thewest.com.au/news/coronavirus/vic-hotel-staff-vaccine-pledge-for-restart-c-2519009>.
117. Western Australia Department of Health. COVID-19 information for hotel guests 2021. Available from: <https://ww2.health.wa.gov.au/-/media/Corp/Documents/Health-for/Infectious-disease/COVID19/COVID-19-Information-for-hotel-guests.pdf> accessed 19 April 2021.
118. Western Australia Department of Health. Testing criteria for SARS-CoV-2 in Western Australia #28 2021. [updated 8 March 2021]. Available from: <https://ww2.health.wa.gov.au/-/media/Corp/Documents/Health-for/Infectious-disease/COVID19/COVID19-Testing-Criteria-for-SARS-CoV-2-WA-28.pdf> accessed 19 April 2021.
119. Department of Health. COVID-19 Information for travellers in self-isolation at hotels Western Australia: Government of Western Australia; 2020. Available from:

<https://www.healthywa.wa.gov.au/-/media/Corp/Documents/Health-for/Infectious-disease/COVID19/COVID19-Information-for-travellers-in-self-isolation-at-hotels.pdf>  
accessed 10 February 2021.

120. Hastie H. Security not required to wear masks on hotel quarantine floors with infected guests Sydney, Australia: The Sydney Morning Herald; 2021. Available from: <https://www.smh.com.au/national/security-not-required-to-wear-masks-on-hotel-quarantine-floors-with-infected-guests-20210202-p56yvu.html> accessed 10 February 2021.
121. Warriner J. Urgent review of WA hotel quarantine begins after COVID-19 positive worker. *ABC News* 2021 (26 February). Available from: <https://www.abc.net.au/news/2021-02-26/review-into-wa-hotel-quarantine-airflow-after-patient-903-breach/13197546>.
122. Laschon E. WA government plans to make COVID-19 vaccination mandatory for hotel quarantine workers. *ABC News* 2021 (12 April). Available from: <https://www.abc.net.au/news/2021-04-12/mandatory-vaccination-for-quarantine-workers-in-wa/100063214>.
